# Supplementary material
Source: PubMed Central journal article supplement (PMC7172980)

GI-19

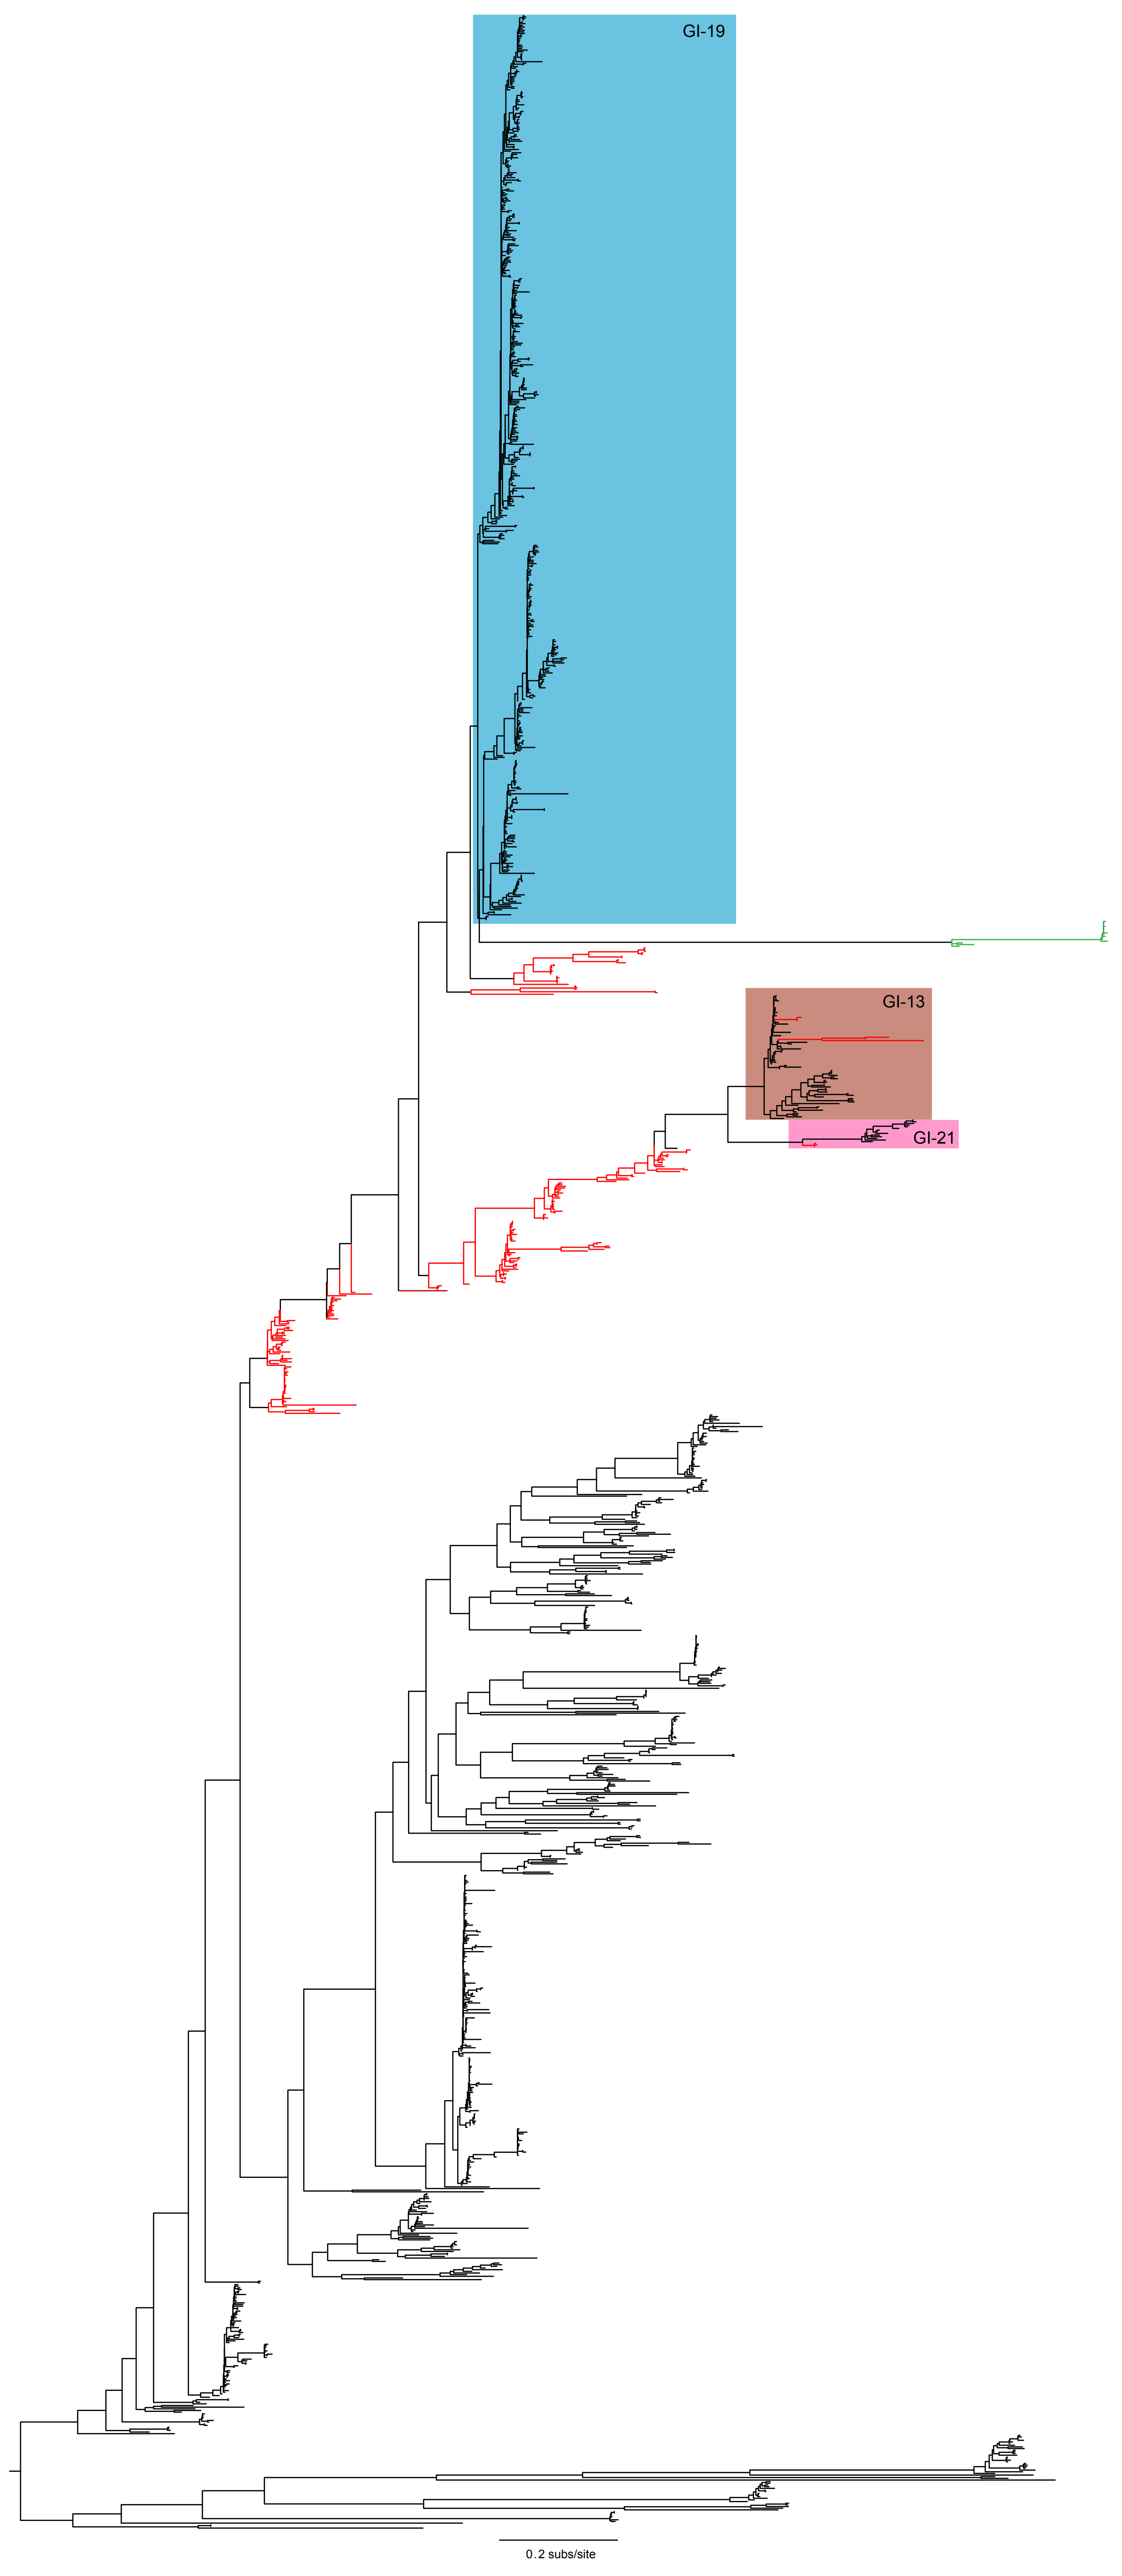

0.2 subs/site

Supplement: mmc2.pdf [file mmc2.pdf]

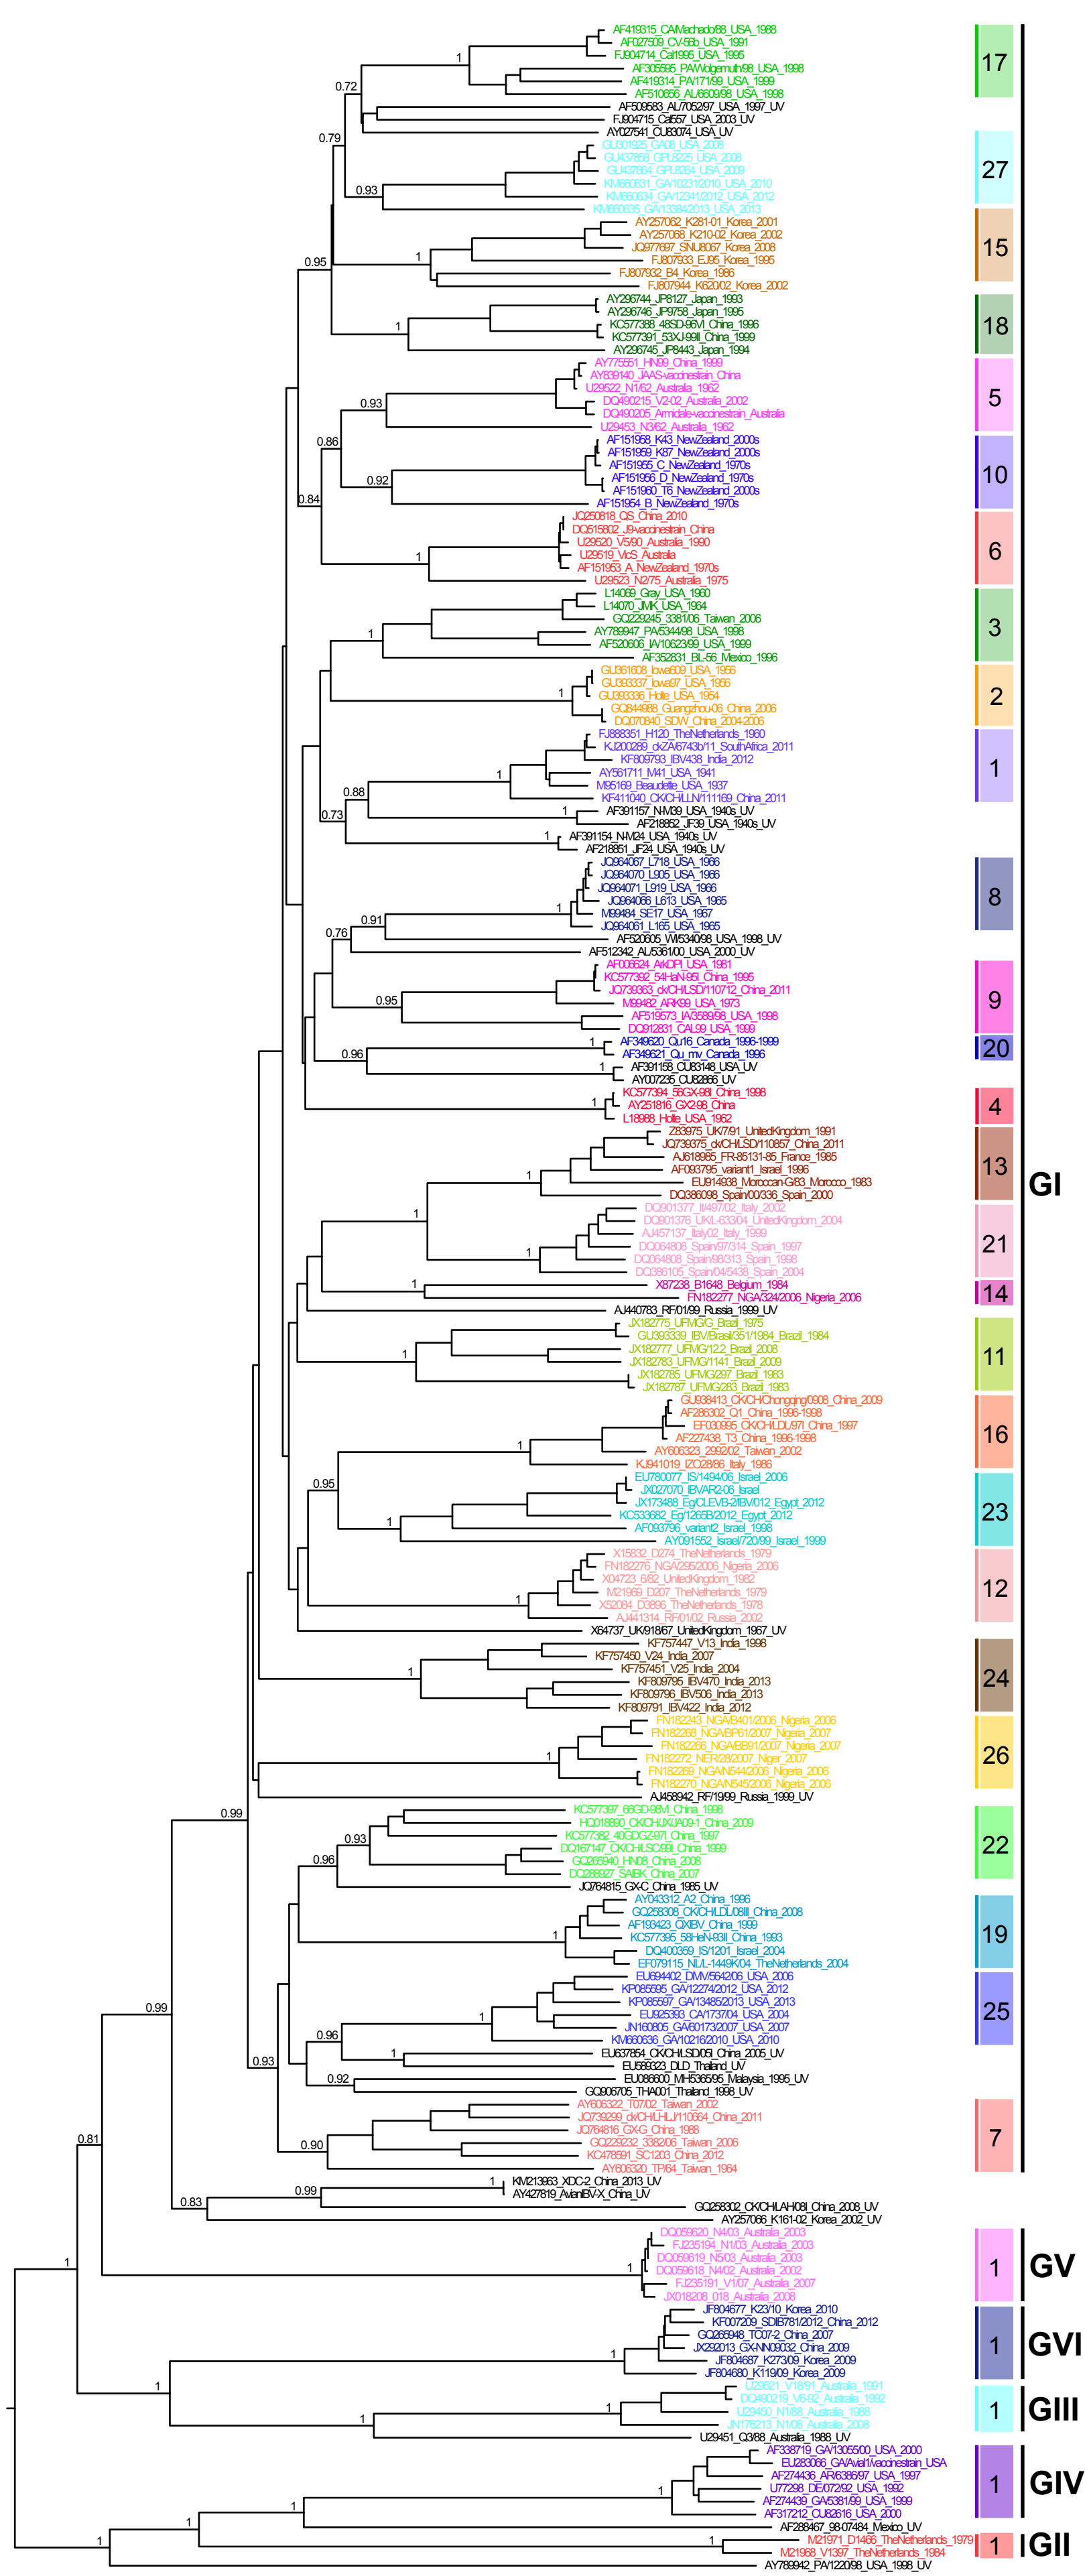

Supplement: mmc3.pdf [file mmc3.pdf]
